# Supplementary material for: Highly Selective Detection of Paraoxon in Food Based on the Platform of Cu Nanocluster/MnO2 Nanosheets
Source: MDPI journal article supplement (doi:10.3390/nano12091429), 2022-04-22
Supplement: s1 [file s1]

# Highly Selective Detection of Organophosphorus Pesticides in Food Based on the Platform of Cu Nanocluster/MnO<sub>2</sub> Nanosheets

Shuo Liu <sup>1,†</sup>, Peng Zhang <sup>2,†</sup>, Yuling Miao <sup>1</sup>, Chenmin Li <sup>1</sup>, Yu-e Shi <sup>1,\*</sup>, Jinhua Liu <sup>3</sup>, Yun-kai Lv <sup>1</sup>  
and Zhenguang Wang<sup>1,\*</sup>

<sup>1</sup> Key Laboratory of Chemical Biology of Hebei Province; Key Laboratory of Medicinal Chemistry and Molecular Diagnosis, Ministry of Education; College of Chemistry & Environmental Science, Hebei University, Baoding 071002, China

<sup>2</sup> Department of Pharmacy, Shenzhen Luohu People's Hospital, No. 47 Youyi Rd, Luohu, Shenzhen 518001, China

<sup>3</sup> Institute of Advanced Materials (IAM) , Key Laboratory of Flexible Electronics (KLOFE), Nanjing Tech University, 30 South Puzhu Road, Nanjing 211816,

\* Correspondence: zgwang@hbu.edu.cn, shiyue1220@163.com

† These authors contributed equally to this work.

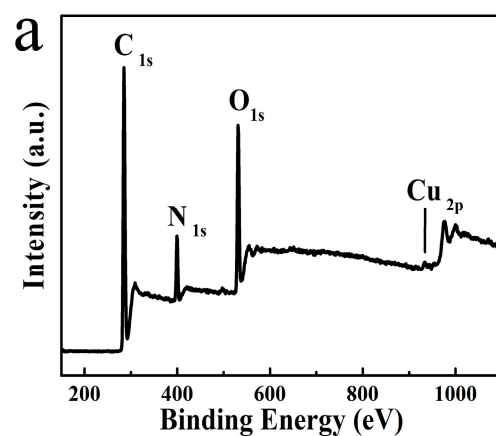

**Figure S1.** Full scan XPS spectrum of CuNCs.

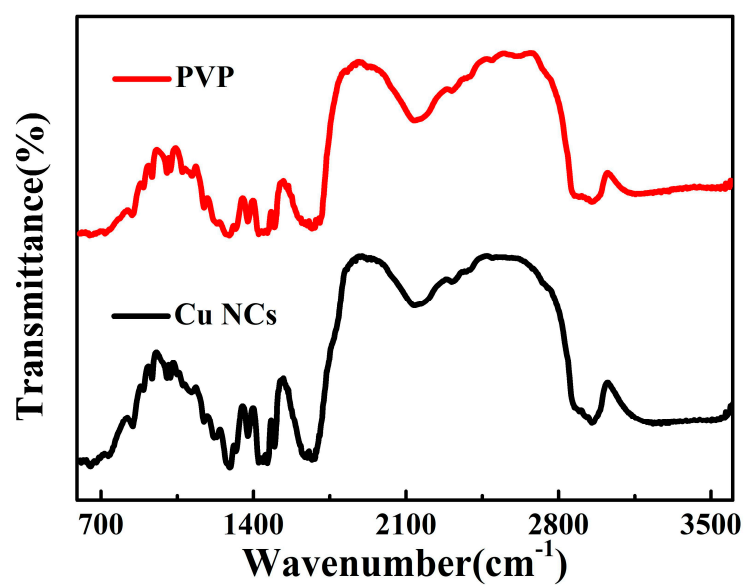

**Figure S2.** FTIR spectra of PVP (red line) and Cu NCs (black line).

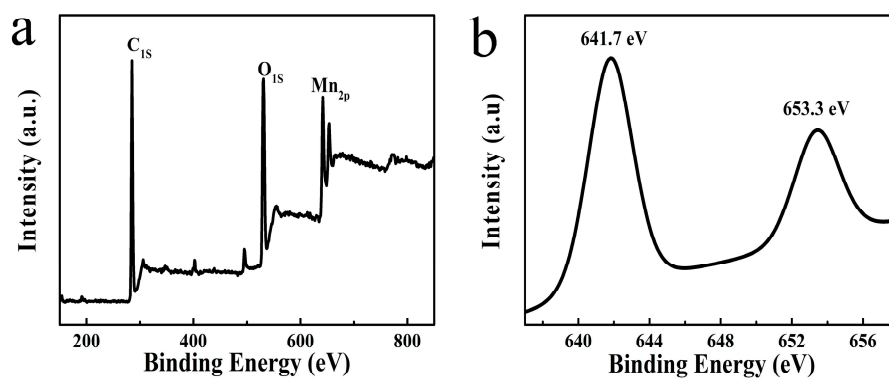

**Figure S3.** (a) Full scan XPS spectrum of MnO<sub>2</sub> nanosheets; (b) High resolution Mn 2p XPS spectrum of MnO<sub>2</sub> nanosheets.

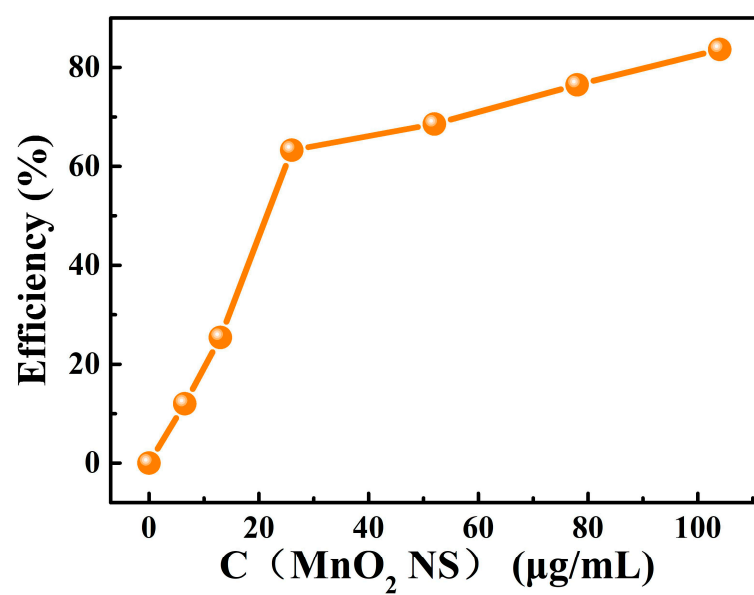

**Figure S4.** Evolution of quenching efficiency as a function of MnO<sub>2</sub> nanosheets concentrations.

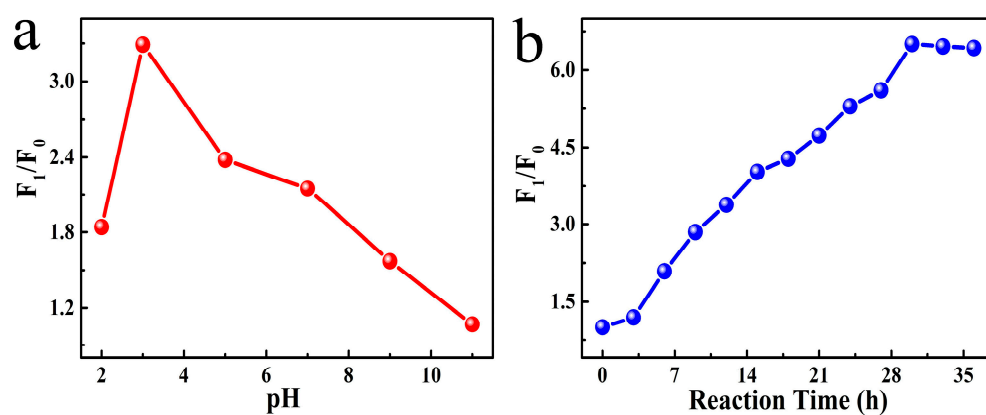

**Figure S5.** Evolution of ratio of fluorescence intensities as a function of pH (a) and reaction time (b). All the intensities were recorded at 423 nm, excited at 380 nm.

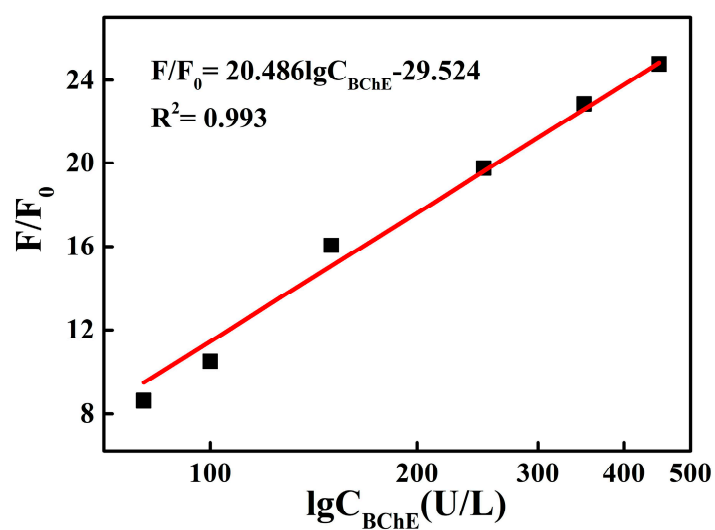

**Figure S6.** Relationship between the ratio of fluorescence intensities and the concentration of BChE. All the intensities were recorded at 423 nm, excited at 380 nm.

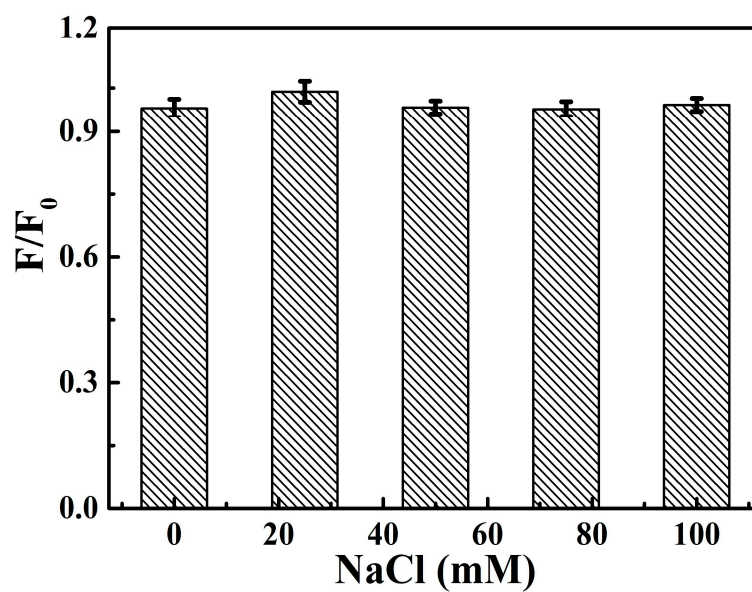

**Figure S7.** Evolution of fluorescence intensity ratio as a function of NaCl concentration.

**Table S1.** Fluorescence lifetimes ( $\tau_{1-3}$ , ns) and fractions of the emission intensity ( $f_{1-3}$ , %) obtained from the fitting of experimental fluorescence decay data by three-exponential functions of Cu NCs with and without adding MnO<sub>2</sub> nanosheets, from which the average emission lifetimes ( $\tau_{avg}$ , ns) were calculated. All the curves were detected at 423 nm, under the excitation of 380 nm.

| Sample                                 | $\tau_1$ (ns) | $\tau_2$ (ns) | $\tau_3$ (ns) | $\tau_{average}$ (ns) |
|----------------------------------------|---------------|---------------|---------------|-----------------------|
| Cu NCs                                 | 1.49(42.59%)  | 2.82(51.11%)  | 11.06(6.30%)  | 2.78                  |
| Cu NCs +MnO <sub>2</sub><br>nanosheets | 0.92(23.08%)  | 3.40(65.40%)  | 10.30(11.53%) | 3.62                  |

**Table S2.** Concentrations of the interference species.

| Interference     | Concentration |
|------------------|---------------|
| Na <sup>+</sup>  | 1.6 mM        |
| K <sup>+</sup>   | 2.0 mM        |
| Ca <sup>2+</sup> | 14 mM         |
| Co <sup>2+</sup> | 1.0 mM        |
| Cu <sup>2+</sup> | 1.0 mM        |
| Pb <sup>2+</sup> | 1.0 mM        |
| Al <sup>3+</sup> | 1.0 mM        |
| Cysteine (Cys)   | 250 $\mu$ M   |
| Glucose (Glu)    | 6 mM          |
| Vitamine (ASA)   | 50 $\mu$ M    |
| Histidine (His)  | 50 $\mu$ M    |
| Glycine (Gly)    | 50 $\mu$ M    |
| Lysine (Lys)     | 50 $\mu$ M    |
